# Supplementary material
Source: publisher figshare collection journal article supplement (https://sage.figshare.com/ndownloader/files/14878079)
Supplement: Supplementary file 1 [file 14878079]

# Fluoridated Water Modifies the Effect of Breastfeeding on Dental Caries

D.H. Ha, A.J. Spencer, K.G. Peres, A.J. Rugg-Gunn, J.A. Scott, and L.G. Do

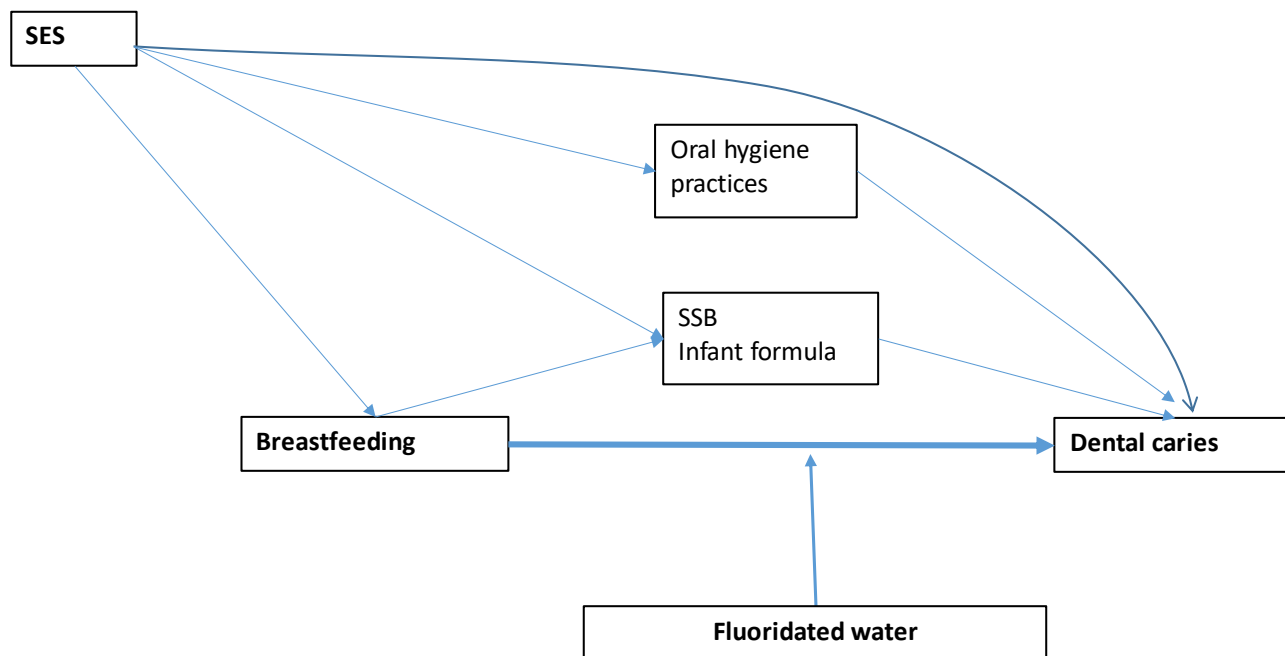

**Appendix Figure:** Directed Acyclic Graph (DAG) of the pathways between breastfeeding and dental caries with fluoridated water as an effect modifier.

Appendix Table 1: Caries experience in the primary dentition among 5-6 year-old children by family and child characteristics in groups exposed to water fluoridation (WF) or not exposed to water fluoridation (NF)

|                                  | WF group              |                          | NF group              |                          |
|----------------------------------|-----------------------|--------------------------|-----------------------|--------------------------|
|                                  | Prevalence            | Severity                 | Prevalence            | Severity                 |
|                                  | Weighted %<br>(95%CI) | Weighted mean<br>(95%CI) | Weighted %<br>(95%CI) | Weighted mean<br>(95%CI) |
| <b>All children</b>              | 28.0 (25.0-31.2)      | 1.7 (1.4-2.0)            | 39.5 (36.4-42.7)      | 3.6 (3.1-4.2)            |
| <b>Breastfeeding</b>             |                       |                          |                       |                          |
| Minimal <sup>a</sup>             | 27.3 (22.3-32.9)      | 2.0 (1.2-2.8)            | 47.6 (41.5-53.7)      | 5.4 (4.2-6.6)            |
| Breastfed 1–<6 mo <sup>b</sup>   | 28.8 (23.7-34.5)      | 1.6 (1.2-2.1)            | 39.5 (34.3-44.8)      | 3.2 (2.5-4.0)            |
| Breastfed 6–24 mo <sup>c</sup>   | 26.1 (21.9-30.8)      | 1.4 (1.0-1.8)            | 29.3 (25.1-34.0)      | 2.2 (1.6-2.8)            |
| Sustained <sup>d</sup>           | 41.5 (30.3-53.6)      | 2.4 (1.4-3.4)            | 60.8 (49.0-71.4)      | 5.6 (3.4-7.8)            |
| <b>SSB intake</b>                |                       |                          |                       |                          |
| Low                              | 20.3 (17.4-23.6)      | 0.9 (0.7-1.1)            | 29.9 (26.4-33.6)      | 2.3 (1.8-2.8)            |
| Moderate                         | 31.8 (25.8-38.5)      | 1.6 (1.0-2.1)            | 46.5 (39.9-53.2)      | 4.6 (3.4-5.7)            |
| High                             | 52.0 (42.9-61.0)      | 4.6 (3.0-6.2)            | 56.7 (47.2-65.7)      | 6.4 (4.6-8.2)            |
| <b>Household Income</b>          |                       |                          |                       |                          |
| Low                              | 40.0 (33.9-46.4)      | 3.0 (2.2-3.8)            | 51.4 (46.0-56.5)      | 5.3 (4.3-6.2)            |
| Medium                           | 26.2 (22.4-30.4)      | 1.2 (1.0-1.5)            | 35.2 (31.1-39.6)      | 3.1 (2.3-3.9)            |
| High                             | 19.4 (15.7-23.7)      | 0.9 (0.5-1.3)            | 28.1 (22.7-34.3)      | 1.8 (1.3-2.4)            |
| <b>Parental education</b>        |                       |                          |                       |                          |
| School                           | 36.1 (29.2-43.7)      | 2.8 (2.0-3.7)            | 53.3 (56.9-59.6)      | 6.1 (4.8-7.3)            |
| Vocational training              | 27.9 (22.3-34.3)      | 1.4 (0.9-1.9)            | 37.6 (31.5-44.1)      | 3.1 (2.2-4.1)            |
| Tertiary education               | 24.3 (21.0-28.0)      | 1.2 (0.9-1.5)            | 31.6 (27.6-35.9)      | 2.3 (1.8-2.8)            |
| <b>Parents' country of birth</b> |                       |                          |                       |                          |
| Australian born                  | 23.6 (20.6-27.0)      | 1.1 (0.8-1.4)            | 39.1 (35.6-42.7)      | 3.6 (3.0-4.2)            |
| Overseas born                    | 35.3 (30.2-40.8)      | 2.6 (2.0-3.2)            | 41.4 (35.5-47.6)      | 3.8 (2.8-4.7)            |
| <b>Infant formula used</b>       |                       |                          |                       |                          |
| Never or <1 month                | 31.1 (25.6-37.2)      | 2.4 (1.6-3.1)            | 38.4 (33.0-45.1)      | 3.6 (2.7-4.5)            |
| 1+ month                         | 26.8 (23.4-30.6)      | 1.4 (1.1-1.7)            | 39.7 (36.4-43.2)      | 3.6 (3.0-4.2)            |

WF: Children exposed to fluoridated water during the first 2 years of life

NF: Children not exposed to fluoridated water during the first 2 years of life

95%CI: 95% confidence intervals

<sup>a</sup> None or <1 months, <sup>b</sup> 1–< 6 months, <sup>c</sup> 6–24 months, <sup>d</sup> >24 months

Appendix Table 2: Multivariable regression models including toothbrushing frequency in groups exposed to water fluoridation (WF) or not exposed to water fluoridation (NF).

|                                  | WF group                 |                        | NF group                 |                        |
|----------------------------------|--------------------------|------------------------|--------------------------|------------------------|
|                                  | Prevalence<br>PR (95%CI) | Severity<br>MR (95%CI) | Prevalence<br>PR (95%CI) | Severity<br>MR (95%CI) |
| <b>Breastfeeding</b>             |                          |                        |                          |                        |
| Minimal <sup>a</sup>             | 1.0 (0.7-1.3)            | 1.4 (0.9-2.3)          | 1.4 (1.1-1.9)            | 2.5 (1.6-3.9)          |
| Breastfed 1–<6 mo <sup>b</sup>   | 1.1 (0.9-1.5)            | 1.4 (0.9-2.1)          | 1.4 (1.0-1.8)            | 1.7 (1.1-2.7)          |
| Breastfed 6–24 mo <sup>c</sup>   | Ref                      | Ref                    | Ref                      | Ref                    |
| Sustained <sup>d</sup>           | 1.2 (0.9-1.7)            | 0.9 (0.5-1.5)          | 1.8 (1.4-2.4)            | 2.2 (1.3-3.8)          |
| <b>Household Income</b>          |                          |                        |                          |                        |
| Low                              | 1.8 (1.3-2.4)            | 2.3 (1.5-3.5)          | 1.5 (1.1-2.0)            | 1.9 (1.2-2.9)          |
| Medium                           | 1.4 (1.0-1.8)            | 1.5 (1.0-2.2)          | 1.3 (1.0-1.6)            | 1.4 (0.1-2.1)          |
| High                             | Ref                      | Ref                    | Ref                      | Ref                    |
| <b>Parental education</b>        |                          |                        |                          |                        |
| School                           | 1.0 (0.7-1.3)            | 1.4 (1.0-1.9)          | 1.2 (1.0-1.5)            | 1.6 (1.1-2.4)          |
| Vocational training              | 1.2 (0.9-1.5)            | 1.1 (0.7-1.7)          | 1.0 (0.8-1.3)            | 0.9 (0.6-1.3)          |
| Tertiary education               | Ref                      | Ref                    | Ref                      | Ref                    |
| <b>Parents' country of birth</b> |                          |                        |                          |                        |
| Australian born                  | Ref                      | Ref                    | Ref                      | Ref                    |
| Overseas born                    | 1.3 (1.1-1.6)            | 1.7 (1.2-2.5)          | 1.1 (0.9-1.3)            | 1.1 (0.8-1.4)          |
| <b>SSB intake</b>                |                          |                        |                          |                        |
| Low                              | Ref                      | Ref                    | Ref                      | Ref                    |
| Moderate                         | 1.4 (1.1-1.8)            | 1.4 (1.0-2.0)          | 1.4 (1.2-1.7)            | 1.8 (1.3-2.4)          |
| High                             | 1.8 (1.4-2.4)            | 2.8 (1.8-4.2)          | 1.6 (1.2-2.0)            | 2.0 (1.3-2.9)          |
| <b>Infant formula used</b>       |                          |                        |                          |                        |
| Never or <1 month                | Ref                      | Ref                    | Ref                      | Ref                    |
| 1+ month                         | 0.8 (0.6-1.0)            | 0.5 (0.3-0.7)          | 0.9 (0.7-1.2)            | 0.7 (0.5-1.1)          |
| <b>Toothbrushing frequency</b>   |                          |                        |                          |                        |
| <2 times/day                     | 1.2 (1.0-1.4)            | 1.4 (1.1-1.8)          | 0.9 (0.8-1.1)            | 0.8 (0.6-1.1)          |
| 2+ times/day                     | Ref                      | Ref                    | Ref                      | Ref                    |

Model specification was the same as for models 3 in the main text + toothbrushing frequency.

PR: Prevalence ratio; MR: Mean ratio; 95% CI: 95% confidence interval; Ref: Reference group

<sup>a</sup> None or <1 months, <sup>b</sup> 1–< 6 months, <sup>c</sup> 6–24 months, <sup>d</sup> >24 months

Appendix Table 3: Multivariable regression models with interactions between breastfeeding and exposure to fluoridated water.

|                                             | Prevalence<br>PR (95%CI) | Severity<br>MR (95%CI) |
|---------------------------------------------|--------------------------|------------------------|
| <b>Breastfeeding</b>                        |                          |                        |
| Minimal <sup>a</sup>                        | 1.0 (0.7-1.3)            | 1.2 (0.7-2.0)          |
| Breastfed 1–<6 mo <sup>b</sup>              | 1.1 (0.9-1.4)            | 1.2 (0.8-1.9)          |
| Breastfed 6–24 mo <sup>c</sup>              | Ref                      | Ref                    |
| Sustained <sup>d</sup>                      | 1.3 (0.9-1.8)            | 1.1 (0.7-1.8)          |
| <b>Exposure to water fluoridation</b>       |                          |                        |
| Not exposed (NF)                            | 1.1 (0.9-1.4)            | 1.5 (1.0-2.2)          |
| Exposed (WF)                                | Ref                      | Ref                    |
| <b>Breastfeeding x water fluoridation *</b> |                          |                        |
| Minimal <sup>a</sup>                        | 1.5 (1.1-2.2)            | 1.9 (1.0-3.5)          |
| Breastfed 1–<6 mo <sup>b</sup>              | 1.2 (0.9-1.7)            | 1.3 (0.8-2.2)          |
| Breastfed 6–24 mo <sup>c</sup>              | Ref                      | Ref                    |
| Sustained <sup>d</sup>                      | 1.3 (0.9-2.0)            | 1.7 (0.9-3.3)          |

Model specification was the same as for models 3 in the main text + exposure to fluoridated water and interaction between breastfeeding and exposure to fluoridated water.

\*: Interaction terms of groups with no exposure to fluoridated water (NF) vs groups with exposure to fluoridated water (WF).

PR: Prevalence ratio; MR: Mean ratio; 95% CI: 95% confidence interval; Ref: Reference group

<sup>a</sup> None or <1 months, <sup>b</sup> 1–< 6 months, <sup>c</sup> 6–24 months, <sup>d</sup> >24 months

Appendix Table 4: Per cent of children who brushed their teeth at least twice a day by exposure to water fluoridation (WF) and breastfeeding duration

|                                              | <b>Minimal<sup>a</sup></b> | <b>Breastfed 1–&lt;6 mo<sup>b</sup></b> | <b>Breastfed 6–24 mo<sup>c</sup></b> | <b>Sustained<sup>d</sup></b> |
|----------------------------------------------|----------------------------|-----------------------------------------|--------------------------------------|------------------------------|
|                                              | % (95% CI)                 | % (95% CI)                              | % (95% CI)                           | % (95% CI)                   |
| <b>Exposed to fluoridated water (WF)</b>     | 58.4 (51.9-65.0)           | 60.3 (54.6-66.1)                        | 67.0 (63.3-70.8)                     | 52.8 (41.0-64.7)             |
| <b>Not exposed to fluoridated water (NF)</b> | 62.3 (56.9-67.6)           | 65.4 (60.2-70.6)                        | 66.9 (62.5-71.3)                     | 66.5 (55.0-77.9)             |

%. weighted %; 95%CI: 95% confidence intervals

<sup>a</sup> None or <1 months, <sup>b</sup> 1–< 6 months, <sup>c</sup> 6–24 months, <sup>d</sup> >24 months
